# Supplementary material for: Antidepressant Effects of Rhodomyrtone in Mice with Chronic Unpredictable Mild Stress-Induced Depression
Source: PubMed Central journal article supplement (PMC6368369; doi:10.1093/ijnp/pyy091), 2018-11-08

# Supplement Figure 1

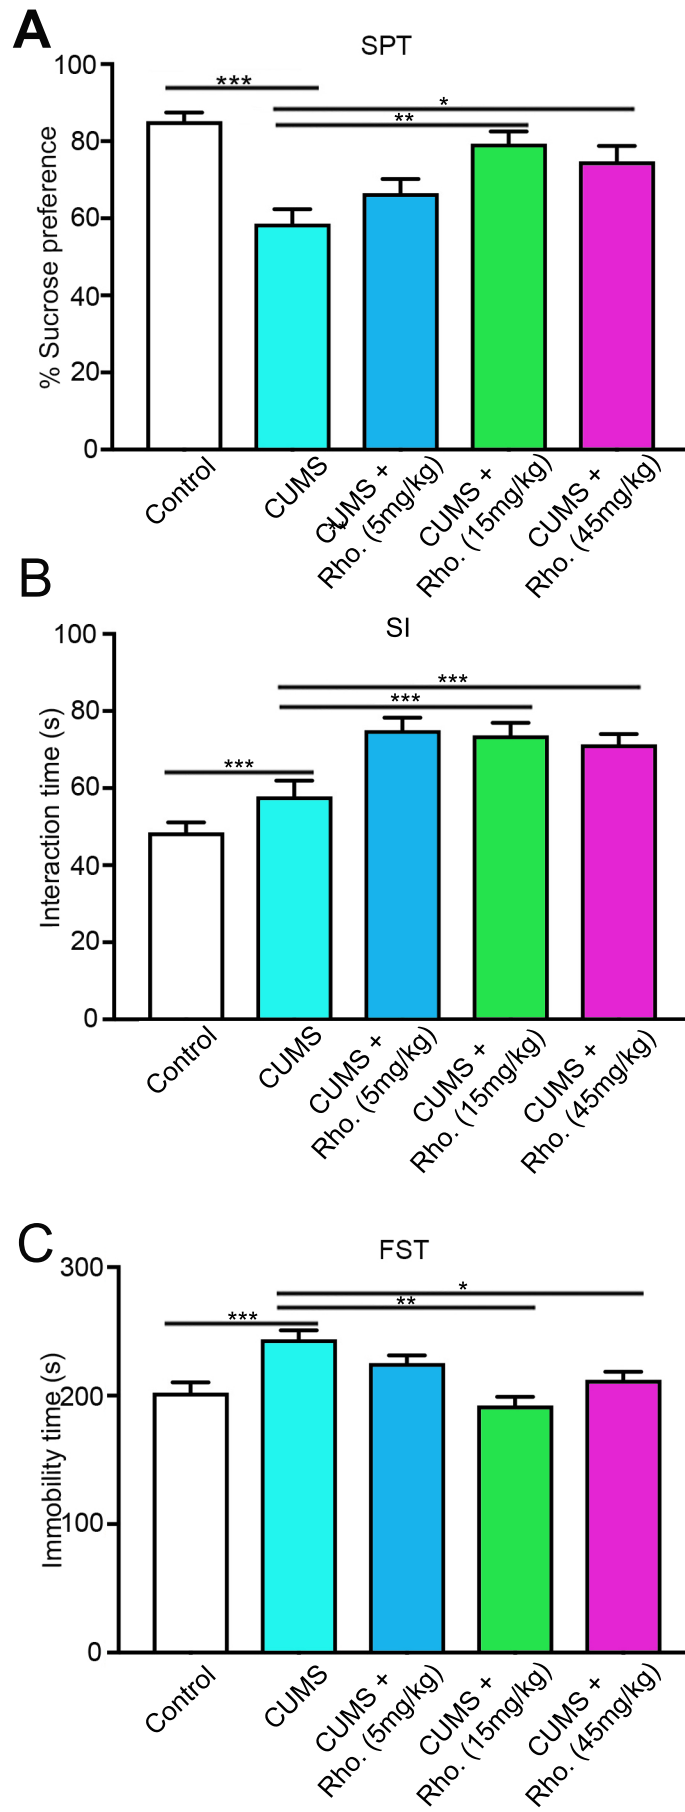

Supplement: pyy091_suppl_supplementary_figure_1.pdf [file pyy091_suppl_supplementary_figure_1.pdf]
